# Supplementary material for: Variations in the Quality of Care at Large Public Hospitals in Beijing, China: A Condition-Based Outcome Approach
Source: PubMed Central journal article supplement (PMC4592271; doi:10.1371/journal.pone.0138948), 2015-10-02
Supplement: pone.0138948.s002.pdf [file pone.0138948.s002.pdf]

## S1\_File

### Risk-adjustment methods

In general terms, the indirect risk standardization involves two steps:

Step One: Establish the risk-adjustment model:  $Y_{ij} \sim f(\text{patient characteristics})$ , where  $Y_{ij}$  is the interested outcome for patient  $i$  from hospital  $j$ . Derive the predicted value of  $Y$  for each individual ( $\widehat{Y}_{ij}$ ).

Step Two: Calculate the risk-standardized outcome measures for each hospital by:  
 $(\sum_{i=1}^n \text{Observed outcomes} / \sum_{i=1}^n \text{Expected outcome}) * \text{population average outcome rate}$ .

*Standard Logistic Regression:*

$$Y_{ij} \sim \text{Bern}(1, \pi_{ij})$$

$$\text{logit}(\pi_{ij}) = \alpha + \beta X_{ij} + \varepsilon_{ij} \quad (1)$$

*Hierarchical Logistic Model:*

$$Y_{ij} \sim \text{Bern}(1, \pi_{ij})$$

$$\text{logit}(\pi_{ij}) = \alpha_{0j} + \beta X_{ij} + \varepsilon_{ij} \quad (2)$$

$$\alpha_{0j} = \alpha + \mu_j$$

Where  $i = 1, \dots, i$  is the patient level indicator,  $j = 1, \dots, j$  is the hospital level indicator,  $Y$  is the outcome of the patient (death/complication=1, survival=0),  $\pi_{ij}$  is the probability of death for patient  $i$  in hospital  $j$ , conditional on patient-level risk factors  $x_{ij}$ . The random effect model expresses that the logit is the sum of hospital-specific intercept  $\alpha_j$  and effects of patient-specific effects  $\beta X_{ij}$ , while the hospital intercept is a random variable with mean  $\alpha$  and random variation  $\mu_j \sim N(0, \tau^2)$ .

In the standard logistic regression models, the SMR is calculated as:

$$\sum_{j=1}^{n_i} Y_{ij} / \sum_{j=1}^{n_i} E(Y_{ij} | \alpha, \beta, X_{ij}); \quad (3)$$

in the hierarchical logistic regression models, the SMR is calculated as:

$$\sum_{j=1}^{n_i} E(Y_{ij} | \alpha_j; X_{ij}, \alpha, \beta, \tau^2) / \sum_{j=1}^{n_i} E(Y_{ij} | \alpha, \beta, \tau^2) \quad (4)$$
