# Supplementary material for: Variations in the Quality of Care at Large Public Hospitals in Beijing, China: A Condition-Based Outcome Approach
Source: PubMed Central journal article supplement (PMC4592271; doi:10.1371/journal.pone.0138948), 2015-10-02
Supplement: pone.0138948.s003.pdf [file pone.0138948.s003.pdf]

## S2\_File

### Minimal Data Sample Codebook

| Variable Name | Value                                                                                                        |
|---------------|--------------------------------------------------------------------------------------------------------------|
| sjnf          | Year (2006-2010)                                                                                             |
| jgdm          | Hospital code                                                                                                |
| S0101         | Payment method                                                                                               |
| S0102         | Number of hospitalization                                                                                    |
| S0104         | Sex (1=male; 2=female)                                                                                       |
| S0105         | Age                                                                                                          |
| S0301         | Discharge date                                                                                               |
| S0401         | Condition at admission (1=emergency; 2=urgent; 3=elective)                                                   |
| S0402         | Diagnosis at admission (ICD-10)                                                                              |
| S0501         | Primary diagnosis at discharge (ICD-10)                                                                      |
| S050101       | Outcome of treatment for primary diagnosis (1=recovered; 2=relieved symptoms; 3=no change; 4=died; 5=others) |
| S0502         | Secondary diagnosis at discharge (ICD-10)                                                                    |
| S050201       | Outcome of treatment for secondary diagnosis                                                                 |

|         |                                                  |
|---------|--------------------------------------------------|
| S0506   | other diagnosis at discharge (ICD-10)            |
| S050601 | Outcome of treatment for other diagnosis         |
| S0507   | other diagnosis at discharge (ICD-10)            |
| S050701 | Outcome of treatment for other diagnosis         |
| S0508   | other diagnosis at discharge (ICD-10)            |
| S050801 | Outcome of treatment for other diagnosis         |
| S0509   | other diagnosis at discharge (ICD-10)            |
| S050901 | Outcome of treatment for other diagnosis         |
| S0510   | other diagnosis at discharge (ICD-10)            |
| S051001 | Outcome of treatment for other diagnosis         |
| S0511   | other diagnosis at discharge (ICD-10)            |
| S051101 | Outcome of treatment for other diagnosis         |
| S0503   | In-hospital complication (ICD-10)                |
| S0504   | External causes of injury and poisoning (ICD-10) |
| S0505   | Surgery code 1 (ICD-9-CM3)                       |
| S0512   | Surgery code 2 (ICD-9-CM3)                       |
| S0513   | Surgery code 3 (ICD-9-CM3)                       |

|       |                               |
|-------|-------------------------------|
| S0514 | Surgery code 4 (ICD-9-CM3)    |
| S0515 | Surgery code 5 (ICD-9-CM3)    |
| N0601 | Total hospitalization expense |

### Sample data

| SJNF  | JGDM      | SOL01 | S0102 | S0104 | S0105 | S0201       | S0301       | S0401 | S0402   | S0501   | S050101 | S0502   | S050201 |
|-------|-----------|-------|-------|-------|-------|-------------|-------------|-------|---------|---------|---------|---------|---------|
| 2,006 | PDY000570 | 3     | 1     | 1     | 54    | 24-Apr-2006 | #####       | 2     | R06.003 | I21.202 | 2       | I25.105 | 2       |
| 2,006 | 400005599 | 1     | 3     | 1     | 67    | #####       | #####       | 2     | R07.401 | I21.402 | 1       | I25.101 | 2       |
| 2,006 | 400686312 | 4     | 1     | 2     | 60    | 07-Apr-2006 | 19-Apr-2006 | 2     | I21.101 | I21.101 | 2       | I25.101 | 2       |
| 2,006 | 400688545 | 4     | 1     | 1     | 46    | 22-Feb-2006 | 24-Feb-2006 | 2     | I21.9   | I21.9   | 2       | I25.101 | 2       |
| 2,006 | 400014014 | 4     | 1     | 1     | 73    | #####       | 26-Oct-2006 | 2     | I21.009 | I21.009 | 2       | I25.103 | 2       |
| 2,006 | 400688385 | 1     | 1     | 1     | 90    | 19-Oct-2006 | 19-Oct-2006 | 1     | I21.304 | I21.005 | 4       | I50.902 | 4       |
| 2,006 | 400003198 | 4     | 1     | 1     | 48    | #####       | #####       | 1     | I21.902 | I21.002 | 5       |         |         |
| 2,007 | 400686312 | 4     | 1     | 1     | 79    | 14-Jan-2007 | 01-Feb-2007 | 2     | I21.303 | I21.303 | 2       | I25.101 | 2       |
| 2,007 | 400686312 | 1     | 2     | 1     | 75    | 11-Apr-2007 | 18-Apr-2007 | 2     | I21.404 | I21.404 | 2       | I25.105 | 2       |
| 2,007 | 400686312 | 1     | 1     | 1     | 67    | 02-Nov-2007 | 17-Nov-2007 | 1     | I21.403 | I21.403 | 2       | I25.105 | 2       |
| 2,007 | 400688545 | 1     | 2     | 1     | 49    | 26-Apr-2007 | #####       | 2     | I21.208 | I21.208 | 2       | I25.101 | 2       |

|       |           |   |   |   |    |             |             |   |         |         |   |         |    |
|-------|-----------|---|---|---|----|-------------|-------------|---|---------|---------|---|---------|----|
| 2,007 | 400744236 | 1 | 1 | 1 | 83 | 16-Oct-2007 | 02-Nov-2007 | 1 | I25.105 | I21.002 | 1 | E78.501 | 2  |
| 2,007 | 400686320 | 1 | 1 | 2 | 71 | 10-Jul-2007 | 20-Jul-2007 | 2 | I21.004 | I21.004 | 1 | I21.002 | 01 |
| 2,007 | 400011489 | 4 | 7 | 2 | 68 | 05-Feb-2007 | 12-Feb-2007 | 2 |         | I21.009 | 2 | I25.103 | 2  |
| 2,007 | 400688385 | 1 | 2 | 2 | 66 | #####       | #####       | 2 | I21.304 | I21.403 | 1 | I50.902 | 2  |
| 2,007 | 400688609 | 1 | 1 | 1 | 70 | 04-Jan-2007 | 17-Jan-2007 | 2 | I21.907 | I21.907 | 2 |         |    |
| 2,008 | 400686312 | 3 | 1 | 1 | 52 | 07-Apr-2008 | 16-Apr-2008 | 2 | I21.207 | I21.207 | 2 | I25.105 | 2  |
| 2,008 | 400688545 | 4 | 1 | 1 | 65 | 07-Jan-2008 | 21-Jan-2008 | 2 | I25.105 | I21.001 | 1 | I10 05  | 2  |
| 2,008 | 400014014 | 1 | 1 | 1 | 48 | #####       | #####       | 3 | I21.103 | I21.103 | 2 | I25.105 | 2  |
| 2,008 | 400688385 | 1 | 4 | 2 | 79 | 22-Feb-2008 | 01-Mar-2008 | 3 | I21.403 | I21.403 | 1 | I50.902 | 2  |
| 2,008 | 400688609 | 1 | 1 | 1 | 66 | #####       | #####       | 2 | I21.002 | I21.002 | 2 | I25.105 | 2  |
| 2,008 | 400010558 | 1 | 1 | 1 | 73 | 03-Feb-2008 | 18-Feb-2008 | 2 |         | I21.002 | 2 | I25.105 | 2  |
| 2,009 | 400686312 | 1 | 2 | 1 | 79 | #####       | #####       | 3 | I21.403 | I21.403 | 2 | I25.105 | 2  |
| 2,009 | 400686312 | 1 | 3 | 1 | 75 | 24-Jun-2009 | 10-Jul-2009 | 2 | I21.103 | I21.103 | 2 | I25.105 | 2  |
| 2,009 | 400686312 | 1 | 2 | 1 | 56 | #####       | 21-Oct-2009 | 3 | I21.103 | I21.103 | 2 | I25.105 | 2  |
| 2,009 | 400688545 | 3 | 1 | 1 | 44 | #####       | 06-Jan-2009 | 2 | I25.105 | I21.403 | 2 | I25.105 | 2  |
| 2,009 | 400688545 | 6 | 1 | 1 | 56 | 14-Nov-2009 | 21-Nov-2009 | 2 | I25.105 | I21.002 | 2 | I25.105 | 2  |
| 2,009 | 102174925 | 1 | 3 | 1 | 60 | 19-Jan-2009 | 18-Feb-2009 | 2 | I21.002 | I21.002 | 1 | I25.105 | 2  |
| 2,009 | 102174925 | 1 | 3 | 1 | 77 | 09-Nov-2009 | #####       | 3 | J45.901 | I21.103 | 1 | I25.105 | 2  |
| 2,009 | 400012916 | 1 | 1 | 1 | 41 | 28-Oct-2009 | 02-Nov-2009 | 1 | I21.403 | I21.403 | 2 | I50.902 | 2  |
| 2,009 | 400686347 | 6 | 1 | 1 | 61 | #####       | #####       | 3 | I21.103 | I21.103 | 1 | I25.105 | 2  |
| 2,009 | 400744236 | 1 | 1 | 1 | 60 | 12-Mar-2009 | 26-Mar-2009 | 1 | I21.403 | I21.403 | 1 | I10 05  | 2  |

|       |           |   |   |   |    |             |             |   |         |         |   |         |   |
|-------|-----------|---|---|---|----|-------------|-------------|---|---------|---------|---|---------|---|
| 2,009 | 400011489 | 3 | 1 | 1 | 48 | 26-Nov-2009 | #####       | 3 |         | I21.002 | 2 | I25.105 | 2 |
| 2,009 | 400688385 | 3 | 1 | 1 | 35 | 26-Oct-2009 | 30-Oct-2009 | 1 | I20.902 | I21.002 | 1 | I50.902 | 2 |
| 2,009 | 400688609 | 3 | 1 | 1 | 53 | 11-Mar-2009 | 18-Mar-2009 | 2 | I21.002 | I21.002 | 2 | I25.105 | 2 |
| 2,009 | 400688609 | 3 | 1 | 1 | 31 | 09-Mar-2009 | 16-Mar-2009 | 1 | I21.002 | I21.002 | 2 | I25.105 | 2 |
| 2,009 | 400010558 | 1 | 1 | 2 | 82 | 01-Apr-2009 | 10-Apr-2009 | 3 |         | I21.002 | 2 | I25.105 | 2 |
| 2,009 | 400000886 | 3 | 1 | 1 | 38 | #####       | #####       | 3 | I21.002 | I21.002 | 2 | I25.105 | 2 |
| 2,009 | 400000886 | 3 | 1 | 1 | 58 | 02-Nov-2009 | 18-Nov-2009 | 3 | I21.103 | I21.103 | 4 | I21.002 | 4 |
| 2,010 | 400686312 | 6 | 1 | 1 | 68 | #####       | #####       | 2 | I21.105 | I21.105 | 2 | I25.105 | 2 |
| 2,010 | 400688545 | 1 | 1 | 1 | 53 | 06-Apr-2010 | 17-Apr-2010 | 3 | R07.401 | I21.004 | 2 | I51.903 | 2 |
| 2,010 | 400688545 | 3 | 1 | 1 | 65 | 26-Jul-2010 | #####       | 2 | I25.105 | I21.002 | 2 | E78.501 | 2 |
| 2,010 | 400688545 | 1 | 1 | 1 | 69 | 08-Jul-2010 | 14-Jul-2010 | 3 | I21.103 | I21.103 | 2 | I10XX03 | 2 |
| 2,010 | 400686347 | 1 | 1 | 1 | 82 | 02-Apr-2010 | 17-Apr-2010 | 3 | I21.403 | I21.403 | 1 | I25.105 | 2 |
| 2,010 | 400014014 | 3 | 1 | 1 | 38 | 18-Jan-2010 | 22-Jan-2010 | 2 |         | I21.902 | 2 | I51.903 | 2 |
| 2,010 | 400688385 | 1 | 1 | 1 | 57 | 02-Mar-2010 | 15-Mar-2010 | 1 | I21.103 | I21.103 | 1 | I50.902 | 1 |
| 2,010 | 400688385 | 6 | 1 | 1 | 39 | 08-Jul-2010 | 18-Jul-2010 | 2 | I25.105 | I21.002 | 1 | I50.902 | 2 |
| 2,010 | 400688609 | 1 | 1 | 1 | 77 | 03-Mar-2010 | 22-Mar-2010 | 3 | I21.103 | I21.103 | 2 | I25.105 | 2 |
| 2,010 | 400000886 | 6 | 1 | 1 | 73 | 02-Jul-2010 | 14-Jul-2010 | 2 | I21.403 | I21.403 | 1 | Z95.804 | 1 |
| 2,010 | 400686291 | 1 | 1 | 1 | 54 | 13-Jul-2010 | 23-Jul-2010 | 2 | I24.803 | I21.403 | 2 | I25.105 | 2 |

Continued:

| S0506   | S050601 | S0507    | S050701 | S0508   | S050801 | S0509   | S050901 | S0510   | S051001 | S0511   | S051101 | S0503   | S0504 | S0505 |
|---------|---------|----------|---------|---------|---------|---------|---------|---------|---------|---------|---------|---------|-------|-------|
| I50.908 | 2       | J42 02   | 2       | J98.402 | 2       | I51.709 | 5       | I27.001 | 5       | I34.001 | 5       |         |       |       |
| I10 05  | 1       | I63.901  | 2       | G45.001 | 2       | K80.203 | 5       |         |         |         |         |         |       |       |
| E11.901 | 2       | E78.502  | 2       |         |         |         |         |         |         |         |         |         |       | 88.5  |
| I51.903 | 2       |          |         |         |         |         |         |         |         |         |         |         |       |       |
| R57.001 | 2       |          |         |         |         |         |         |         |         |         | 2       | 0       | 0     | 36.9  |
| I69.301 | 4       |          |         |         |         |         |         |         |         |         |         |         |       |       |
|         |         |          |         |         |         |         |         |         |         |         |         |         |       |       |
| I48 01  | 2       | I10 02   | 2       | E11.901 | 2       | E78.502 | 2       | I65.205 | 2       |         |         |         |       | 88.5  |
| I50.907 | 2       | I25.206  | 3       | I10 04  | 2       | E78.501 | 2       | E11.901 | 2       | E87.802 | 2       |         |       |       |
| I50.902 | 2       | I25.210  | 2       | I10 05  | 2       | E78.501 | 2       |         |         |         |         |         |       | 36.0  |
| I50.907 | 2       | I10 02   | 2       |         |         |         |         |         |         |         |         |         |       | 36.0  |
| J98.402 | 1       | N18.905  | 2       | K27.903 | 2       |         |         |         |         |         |         |         |       |       |
| I25.101 | 02      | I50.908  | 02      | E78.902 | 02      |         |         |         |         |         |         |         |       | 36.0  |
| I51.703 | 2       | I50.905  | 2       | I10 21  | 2       | E11.901 | 2       | E78.503 | 2       |         |         |         |       |       |
| I45.102 | 5       | I42.202  | 5       | I10 04  | 2       | B17.101 | 5       |         |         |         |         |         |       | 36.0  |
|         |         |          |         |         |         |         |         |         |         |         |         |         |       |       |
| I49.301 | 2       | I50.907  | 3       |         |         |         |         |         |         |         |         |         |       | 36.0  |
| E11.901 | 2       | I69.802  | 5       | M06.991 | 2       | K25 01  | 2       |         |         |         |         |         |       | 36.0  |
| I51.903 | 2       |          |         |         |         |         |         |         |         |         | 2       | 0       | 0     | 0     |
| I10 04  | 2       | E11.901  | 2       | J18.803 | 1       |         |         |         |         |         |         |         |       |       |
| I51.903 | 2       | R77.801  | 2       | R73 02  | 2       | J18.901 | 2       |         |         |         |         | J18.901 |       | 88.5  |
| I51.903 | 5       | E11.901  | 2       |         |         |         |         |         |         |         |         |         |       | 89.1  |
| I25.203 | 2       | Z98.8112 | 5       | Z95.804 | 5       |         |         |         |         |         |         |         |       | 88.5  |
| I50.902 | 2       | I25.208  | 2       | I10 05  | 2       | N18.905 | 2       | E78.501 | 2       | J98.402 | 1       |         |       |       |
| I50.902 | 2       | E78.501  | 2       | E77.801 | 2       | J98.402 | 2       |         |         |         |         | J98.402 |       | 36.1  |
| I51.903 | 2       | I10 05   | 2       |         |         |         |         |         |         |         |         |         |       | 36.0  |
| I50.907 | 2       | I25.302  | 2       |         |         |         |         |         |         |         |         |         |       | 36.0  |
| I48 06  | 1       | I49.002  | 1       | I51.709 | 2       | I50.902 | 2       | K80.002 | 1       | J40 03  | 1       |         |       | 36.0  |
| I48 04  | 2       | I50.908  | 2       | J44.003 | 2       | J15.001 | 2       | J15.101 | 2       | J15.201 | 2       | A04.903 |       | 96.0  |

|         |   |         |   |         |   |         |   |         |   |         |   |  |   |      |
|---------|---|---------|---|---------|---|---------|---|---------|---|---------|---|--|---|------|
| I10 03  | 2 | E78.501 | 2 | R73 02  | 2 |         |   |         |   |         |   |  |   | 36.0 |
| I51.903 | 2 | I10 05  | 2 | B18.201 | 5 | I69.301 | 5 | R94.501 | 2 |         |   |  |   | 36.0 |
| E78.501 | 2 |         |   |         |   |         |   |         |   |         |   |  |   | 36.0 |
| I51.903 | 2 |         |   |         |   |         |   |         |   |         |   |  |   | 36.0 |
|         |   |         |   |         |   |         |   |         |   |         |   |  |   | 88.5 |
| I51.903 | 2 | I49.904 | 2 | I49.002 | 1 | R77.801 | 2 |         |   |         |   |  |   | 00.4 |
| I51.903 | 2 | I10 04  | 2 | Q61.301 | 5 | R77.801 | 2 |         |   |         |   |  |   | 87.4 |
| I51.707 | 2 | I50.908 | 2 | I10 05  | 2 | J98.402 | 2 |         |   |         |   |  |   | 88.7 |
| I51.903 | 2 | E78.501 | 2 |         |   |         |   |         |   |         |   |  | 0 | 88.5 |
| I49.904 | 4 | I25.105 | 4 | I50.908 | 4 | E11.901 | 4 | E78.501 | 4 | K76.001 | 4 |  | 0 | 36.1 |
| E78.501 | 2 | I50.902 | 2 | I10xx04 | 2 |         |   |         |   |         |   |  |   | 36.0 |
| I10XX04 | 2 |         |   |         |   |         |   |         |   |         |   |  |   | 36.0 |
| E79.001 | 2 |         |   |         |   |         |   |         |   |         |   |  |   | 36.0 |
| E78.501 | 2 |         |   |         |   |         |   |         |   |         |   |  |   | 36.0 |
| N18.905 | 2 | R94.501 | 1 | D64.903 | 2 | E79.001 | 2 | I50.907 | 2 | I70.904 | 2 |  |   |      |
| I25.105 | 2 |         |   |         |   |         |   |         |   |         |   |  |   |      |
| I45.102 | 2 | I44.001 | 2 | I44.101 | 2 | I10 05  | 2 | E11.901 | 2 | J06.902 | 2 |  |   | 36.0 |
|         |   |         |   |         |   |         |   |         |   |         |   |  |   | 00.6 |
| I50.907 | 2 | I10 04  | 2 | J42 02  | 2 | K81.101 | 5 | N28.101 | 5 |         |   |  |   | 36.0 |
| E78.501 | 2 | N40xx01 | 2 | I10xx02 | 9 |         |   |         |   |         |   |  |   | 88.5 |
| I50.907 | 2 | I10xx05 | 2 | R94.501 | 2 | E78.501 | 2 | E79.001 | 2 | I49.804 | 2 |  |   | 36.0 |
