# Supplementary material for: Variations in the Quality of Care at Large Public Hospitals in Beijing, China: A Condition-Based Outcome Approach
Source: PubMed Central journal article supplement (PMC4592271; doi:10.1371/journal.pone.0138948), 2015-10-02
Supplement: pone.0138948.s004.pdf [file pone.0138948.s004.pdf]

## S1\_Table

### Inclusion and exclusion criteria for case selection

| Measure Name                                                                        | Inclusion Criteria                                                                                                                                                                     | Exclusion Criteria                                                                                                                                                                       |
|-------------------------------------------------------------------------------------|----------------------------------------------------------------------------------------------------------------------------------------------------------------------------------------|------------------------------------------------------------------------------------------------------------------------------------------------------------------------------------------|
| Measure #1: Risk-standardized Mortality Rate for AMI patient (RSMR-AMI)             | I21                                                                                                                                                                                    | a) age<18 and age>90; b) inpatient stay<1 day; c) transferred to another acute care hospital; d) pregnancy, childbirth, and puerperium conditions (O00-O99); e) missing discharge status |
| Measure #2: Risk-standardized Mortality Rate for Stroke patient (RSMR-Stroke)       | I61-I64                                                                                                                                                                                |                                                                                                                                                                                          |
| Measure #3: Risk-standardized Mortality Rate for Pneumonia patient (RSMR-Pneumonia) | J10-J18                                                                                                                                                                                |                                                                                                                                                                                          |
| Measure #4: Risk-standardized Mortality Rate for CABG patient (RSMR-CABG)           | 36.10-36.19                                                                                                                                                                            |                                                                                                                                                                                          |
| Measure #5: Risk-standardized Post-surgical Complication Rate (RSCR)                | I26.x, I80.2, I44.1, I44.2, I46.x, I47.2, I48.x, I50.x, J90.x, J93.x, N99.0, T81.4, J13.x-J16.x, J19.x, I61.x-I64.x, A40.x, N39.0, R57, T81.1, R58, T80.1, T81.5, K92.2, other T-codes | Also excluded patients with only procedure codes 87-99 (miscellaneous diagnostic and therapeutic procedures)                                                                             |
| Measure #6: Risk-standardized Failure-to-Rescue Rate (FTR)                          |                                                                                                                                                                                        |                                                                                                                                                                                          |
